# Supplementary material
Source: publisher figshare collection journal article supplement (https://sage.figshare.com/ndownloader/files/21904293)
Supplement: Supplementary file 1 [file 21904293]

**Supplementary material**

Table S1. Sensitivity, specificity, positive predictive value, negative predictive value, and accuracy across 9 questions selected (Running, jump up, jump down, stairs up, stairs down, playing with other pets, chasing objects, playing with toys, height of jumping)

|  | Disease + | Disease - |
| --- | --- | --- |
| Checklist + | 47 | 13 |
| Checklist - | 16 | 24 |

|  | Value (%) | 95% CI (%) |
| --- | --- | --- |
| Sensitivity | 74.6 | 62.1-84.7 |
| Specificity | 64.9 | 47.5-79.8 |
| Positive predictive value | 78.3 | 69.5-85.2 |
| Negative predictive value | 60.0 | 48.0-70.9 |
| Accuracy | 71.0 | 61.1-79.6 |

Table S2. Sensitivity, specificity, positive predictive value, negative predictive value, and accuracy across 8 questions (Running, jump up, jump down, stairs up, stairs down, ~~playing with other pets,~~ chasing objects, playing with toys, height of jumping)

|  | Disease + | Disease - |
| --- | --- | --- |
| Checklist + | 46 | 8 |
| Checklist - | 17 | 29 |

|  | Value (%) | 95% CI (%) |
| --- | --- | --- |
| Sensitivity | 73.0 | 60.4-83.4 |
| Specificity | 78.4 | 61.8-90.2 |
| Positive predictive value | 85.2 | 75.4-91.5 |
| Negative predictive value | 63.0 | 52.4-72.6 |
| Accuracy | 75.0 | 65.3-83.1 |

Table S3. Sensitivity, specificity, positive predictive value, negative predictive value, and accuracy across 7 questions (Running, jump up, jump down, stairs up, stairs down, ~~playing with other pets,~~ chasing objects, ~~playing with toys~~, height of jumping).

|  | Disease + | Disease - |
| --- | --- | --- |
| Checklist + | 38 | 3 |
| Checklist - | 25 | 34 |

|  | Value (%) | 95% CI (%) |
| --- | --- | --- |
| Sensitivity | 60.3 | 47.2-72.4 |
| Specificity | 91.9 | 78.1-98.3 |
| Positive predictive value | 92.7 | 80.8-97.6 |
| Negative predictive value | 57.6 | 49.7-65.2 |
| Accuracy | 72.0 | 62.1-80.5 |
